# Supplementary material
Source: Copernicus journal article supplement (doi:10.5194/amt-19-4255-2026)
Supplement: Supplementary file [file amt-19-4255-2026-supplement-title-page.pdf › amt-19-4255-2026-supplement-title-page.pdf]

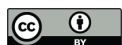

## *Supplement of*

# **Leveraging machine learning techniques and SEVIRI data to detect volcanic clouds composed of ash, ice, and SO<sub>2</sub>**

**Camilo Naranjo et al.**

*Correspondence to:* Camilo Naranjo ([camilo.naranjo@ingv.it](mailto:camilo.naranjo@ingv.it))

- [amt-19-4255-2026-supplement-title-page.pdf](#)
- Supplement
  - [Detection-Event-01\\_20210222.mp4](#)
  - [Detection-Event-02\\_20210304.mp4](#)
  - [Detection-Event-03\\_20240804.mp4](#)
  - [Performance\\_CM\\_20210222.gif](#)
  - [Performance\\_CM\\_20210304.gif](#)
  - [Performance\\_CM\\_20240804.gif](#)
  - [results\\_hyperparameter\\_tuning\\_sorted.csv](#)

The copyright of individual parts of the supplement might differ from the article licence.
